# Supplementary material for: An Archaeometric Study of Lead Glazed Medieval Ceramics (13th–14th Century) from Santarém, Portugal
Source: Preprints.org preprint supplement (doi:10.20944/preprints202403.1707.v1), 2024-03-28
Supplement: Supplementary file 1 [file supplementary]

**Figure S1** - Cross-sections of Santarém samples S1 to S20.


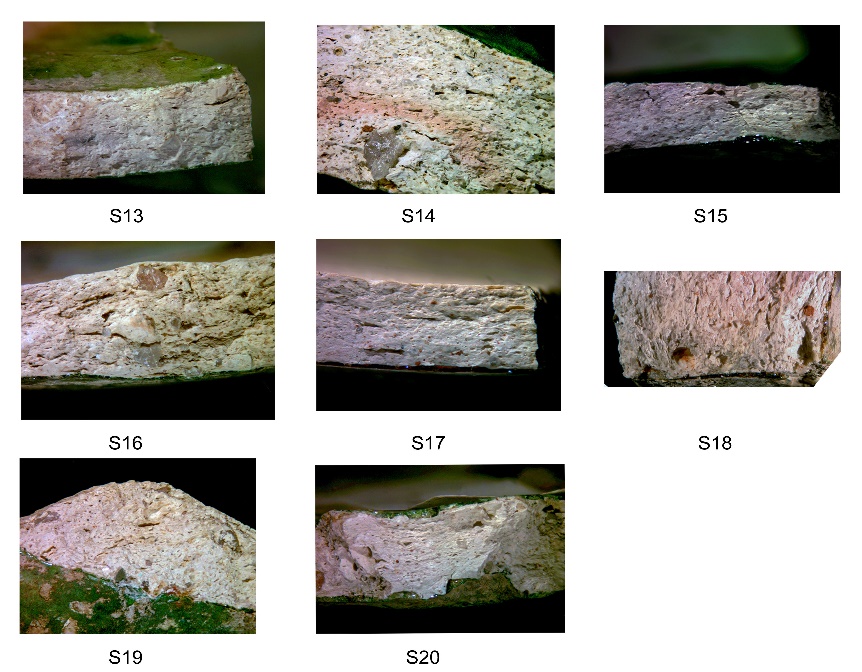


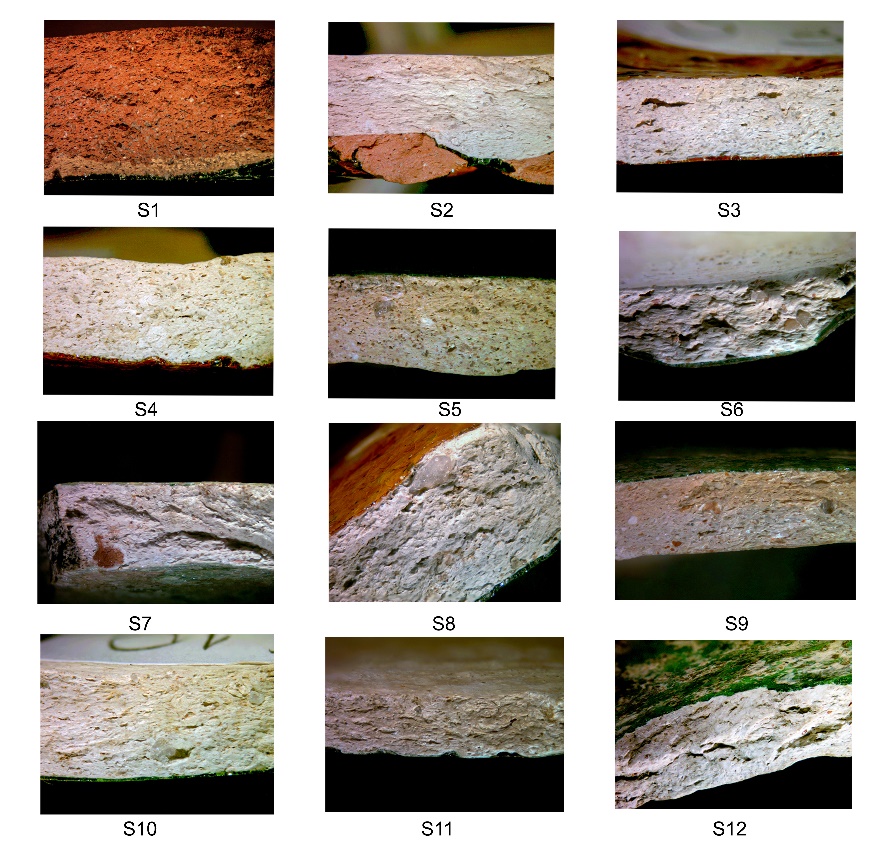


**Figure S2** – Cross-sections of European sherds.


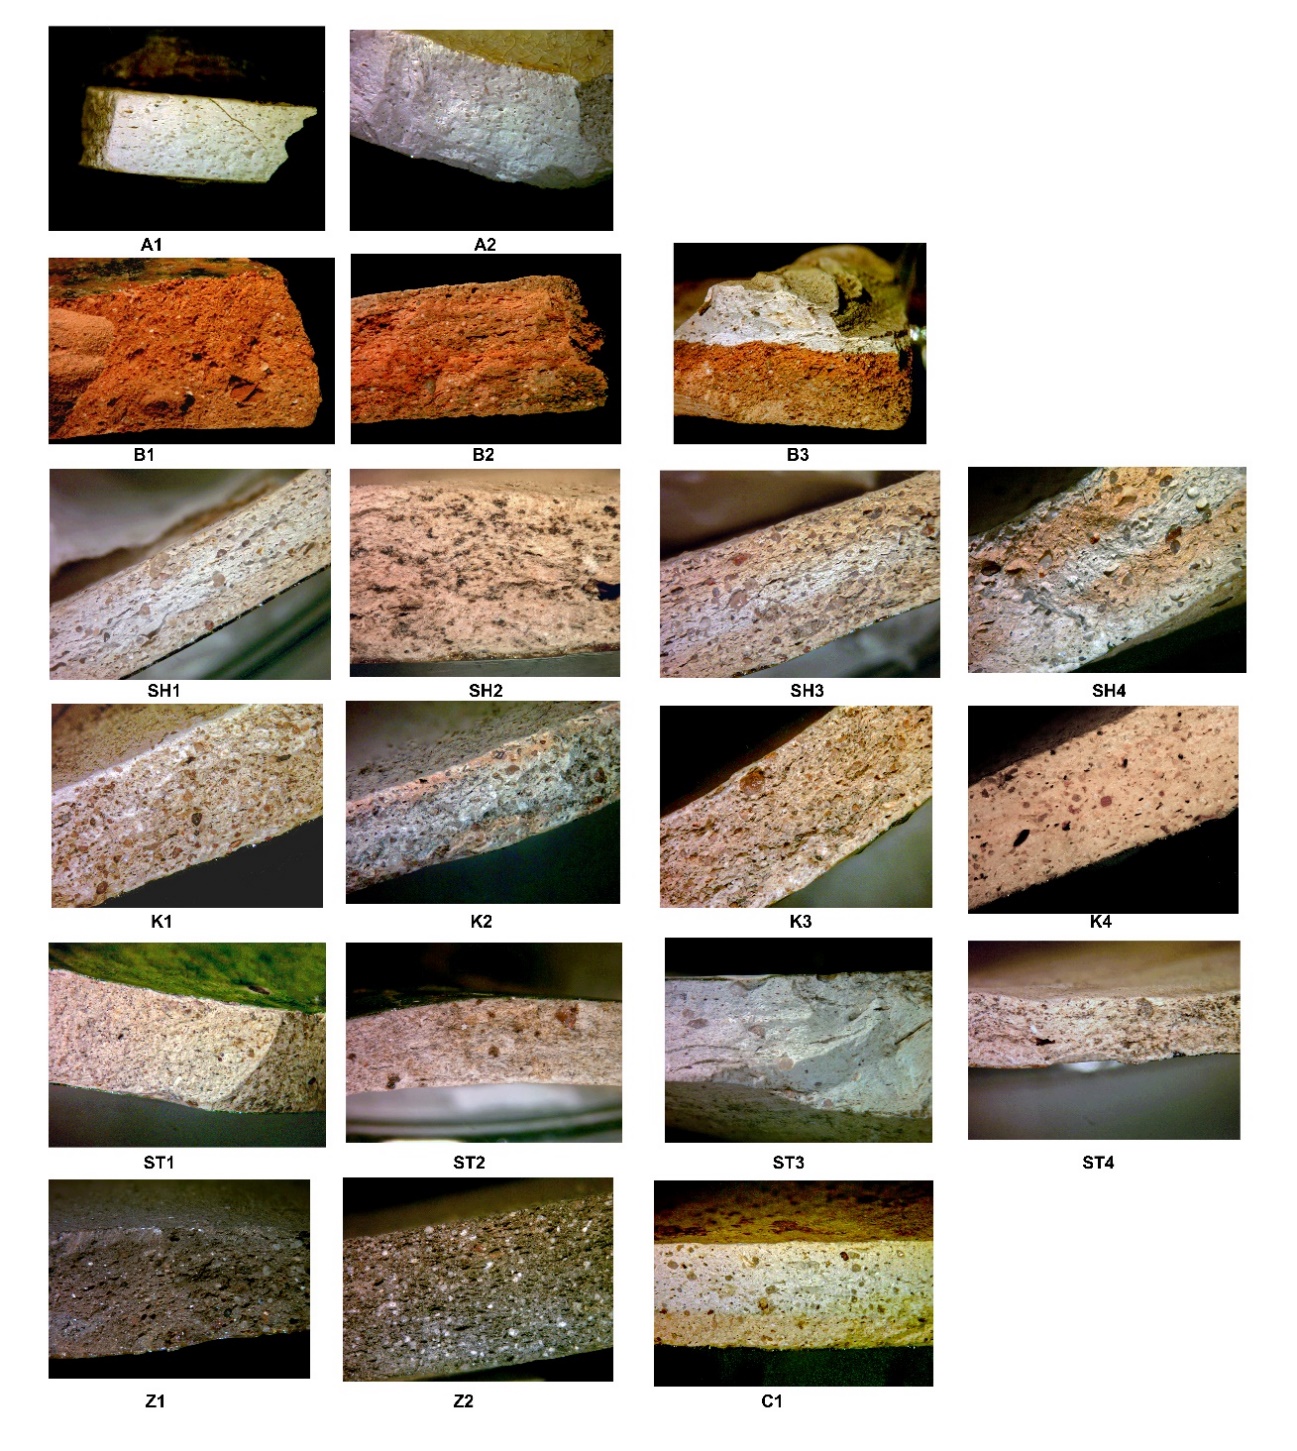


**Table S1** – Santarém stereomicroscope fabric sherd characterization

| **Sample** | **Colour 1** | **Colour 2** | **Pores** | **Pore Orientation** | **Temper** | **Distribution** | **Size** | **Quartz Colour** | **Sherd**  **Thickness**  **(mm)** | **Notes** |
| --- | --- | --- | --- | --- | --- | --- | --- | --- | --- | --- |
| S1 | Brick | Yellow | V | N | H | UM | F | Grey | 5 |  |
| S2 | Light | Rose | NV |  | L | UM | F | Grey | 3 |  |
| S3 | Light |  | V | Y | L-M | UM | F | Grey | 4 |  |
| S4 | Light |  | V | Y | L-M | UM | F | Grey | 5 |  |
| S5 | Light |  | V | N | M | UM | I | Rose/Red | 4 |  |
| S6 | Light |  | V | Y | L-M | BM | F-C | Rose | 2-3.5 |  |
| S7 | Light |  | V | Y | M | UM | F | Mixed | 4 |  |
| S8 | Light |  | V | Y | L-M | UM | F | Grey | 6 | Large Quartz Particles |
| S9 | Light | Cream | NV |  | M | UM | F | Mixed | 3 | Large Quartz Particles;  Red Particles |
| S10 | Light |  | V | Y | L | UM | F | Grey | 5 | Large Quartz Particles |
| S11 | Light |  | V | Y | L | UM | F | Grey | 2-2.5 |  |
| S12 | Light |  | V | Y | L | UM | F | Mixed | 3 | Red Particles |
| S13 | Light |  | V | Y | L | UM | F | Grey | 4 |  |
| S14 | Light | Rose | V | Y | M | UM | I | Grey | 8 | Large Quartz Particles |
| S15 | Light |  | V | Y | M | A | F-I-C | Grey | 2 |  |
| S16 | Light |  | V | Y | M | BM | F-C | Mixed | 4 | Lithic Feldspar |
| S17 | Light |  | NV |  | L | UM | F | Mixed | 4 | Red Particles |
| S18 | Light |  | NV |  | H | A | F-I-C | Mixed | 10 |  |
| S19 | Light |  | V | Y | M | BM | F-C | Mixed | 14X28 |  |
| S20 | Light |  | V | Y | L | UM | F | Grey | 4 |  |

| V - Visible | Y - Yes | L - Low | UM -Unimodal | F - Fine | Grey - Grey/Colourless |
| --- | --- | --- | --- | --- | --- |
| NV - Not Visible | N - No | M - Medium | BM - Bimodal | I - Intermediate |  |
|  |  | H - High | A- All classes | C - Coarse |  |

**Table S2** – European Stereomicroscope fabric sherd characterization

| **Sample** | **Colour 1** | **Colour 2** | **Pores** | **Pore Orientation** | **Temper** | **Distribution** | **Size** | **Quartz Colour** | **Sherd**  **Thickness**  **(mm)** | **Notes** |
| --- | --- | --- | --- | --- | --- | --- | --- | --- | --- | --- |
| A1 | Light |  | V | Y | L | UM | F | Mixed | 3 |  |
| A2 | Light |  | V | Y | L | UM | F | Mixed | 4-5 |  |
| B1 | Brick |  | V | N | H | UM | I | Grey | 5 |  |
| B2 | Brick |  | V | Y | H | UM | I | Grey | 5 |  |
| B3 | Brick |  | V | N | H | UM | I | Grey | 4-5 |  |
| K1 | Light | White | NV |  | H | BM | F-I | Rose | 5-5.5 | Black Particles |
| K2 | Light | Rose | NV |  | H | UM | I | Mixed | 3.5-4 |  |
| K3 | Light |  | V | Y | H | A | F-I-C | Orange | 5 |  |
| K4 | Light |  | V | N | H | UM | I | Mixed | 4 |  |
| Z1 | Dark Brown |  | V | Y | H | BM | F-I | Grey | 4 |  |
| Z2 | Dark Brown |  | V | Y | H | UM | I | Grey | 5 |  |
| SH1 | Light | Cream | NV |  | H | A | F-I-C | Mixed | 3.5-4 |  |
| SH2 | Light |  | NV |  | M | UM | F | Grey | 5 | Mica Orientation |
| SH3 | Light | Cream | V | Y | H | BM | F-C | Mixed | 6-9 |  |
| SH4 | Light | Cream | NV |  | I | UM | I | Grey | 11 | Large Pores; Redish Particles |
| ST1 | Light |  | NV |  | L-M | UM | F | Mixed | 4 |  |
| ST2 | Light |  | NV |  | L-M | UM | F | Mixed | 3.5-4 | Large Quartz Particles |
| ST3 | Light |  | NV |  | L-M | UM | I | Mixed | 4 |  |
| ST4 | Light |  | NV |  | L-M | UM | F | Mixed | 2 | Mica |
| C1 | Light | Cream | NV |  | I | BM | F-I | Grey | 4 |  |

| V - Visible | Y - Yes | L - Low | UM -Unimodal | F - Fine | Grey - Grey/Colourless |
| --- | --- | --- | --- | --- | --- |
| NV - Not Visible | N - No | M - Medium | BM - Bimodal | I - Intermediate |  |
|  |  | H - High | A- All classes | C - Coarse |  |
